# Supplementary material
Source: PubMed Central journal article supplement (PMC6741607)
Supplement: jin-0006-0365-s01.pdf [file jin-0006-0365-s01.pdf]

Figure 1.

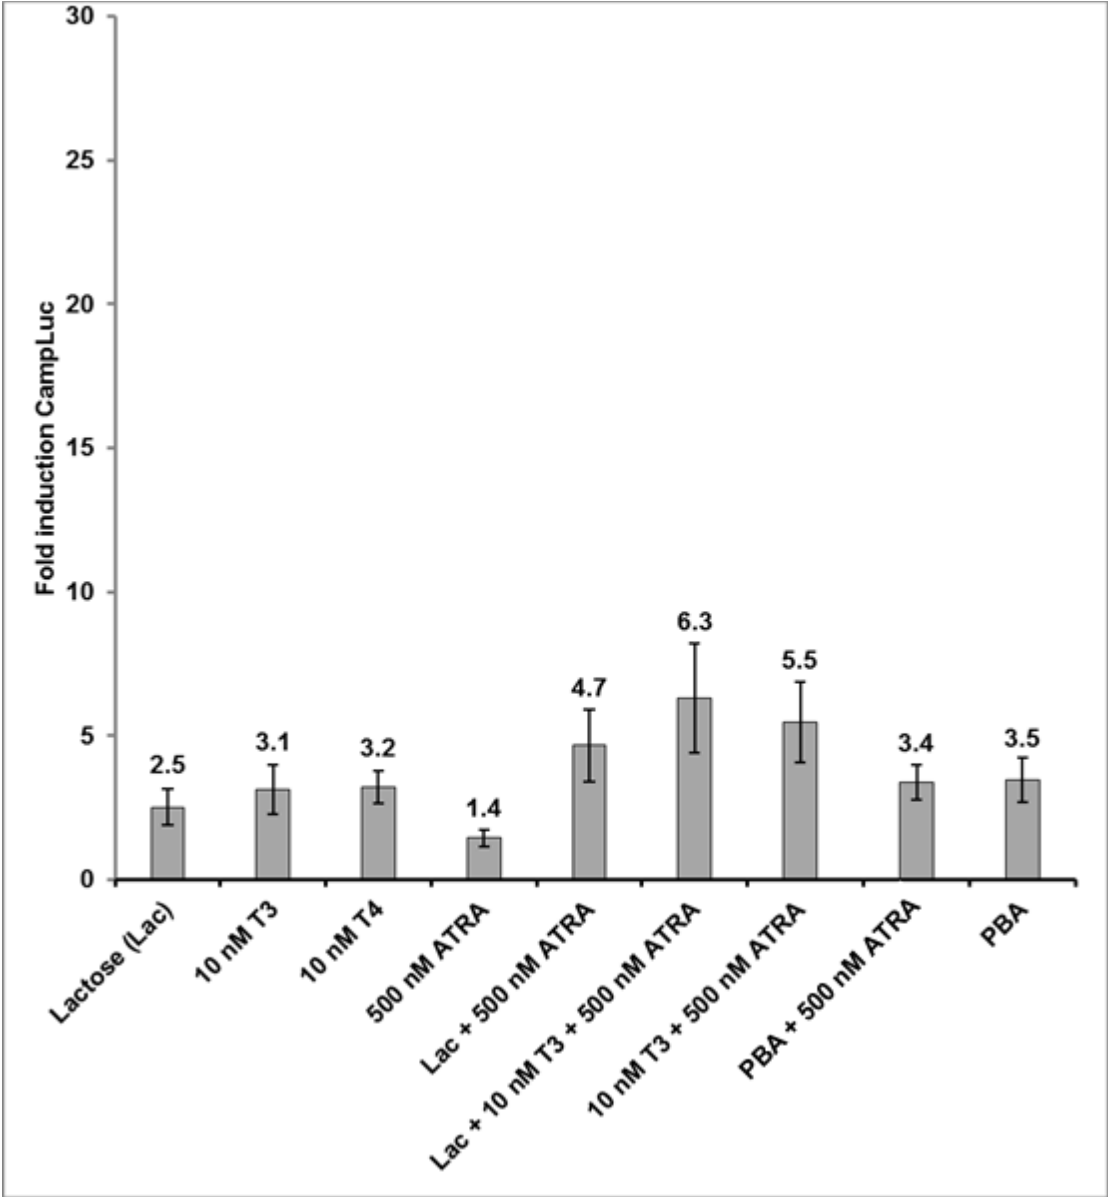

Figure 2.

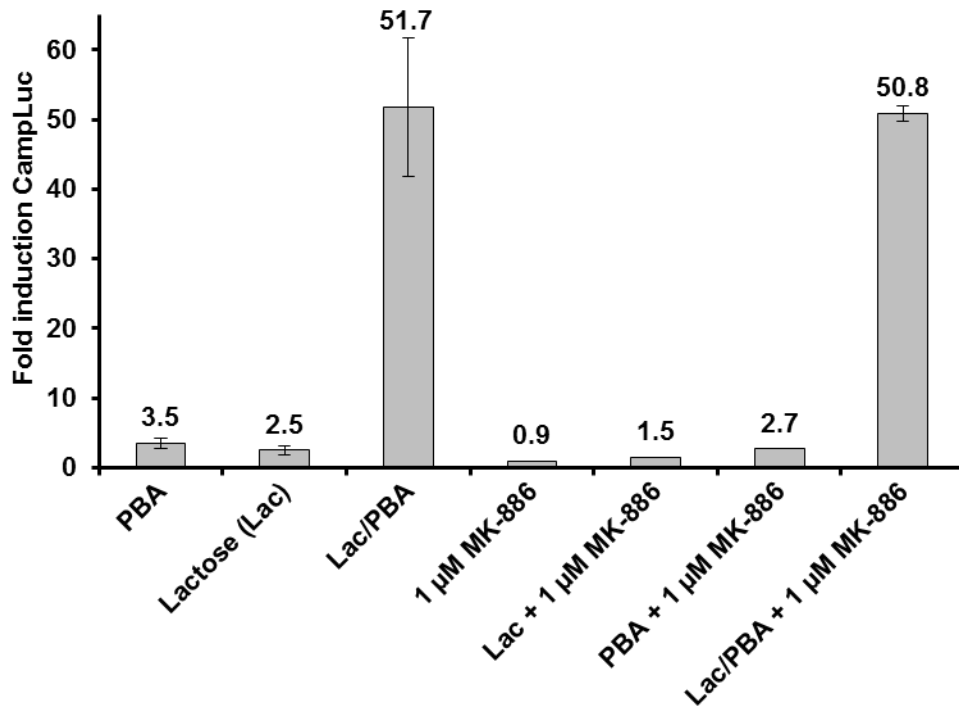

Figure 3.

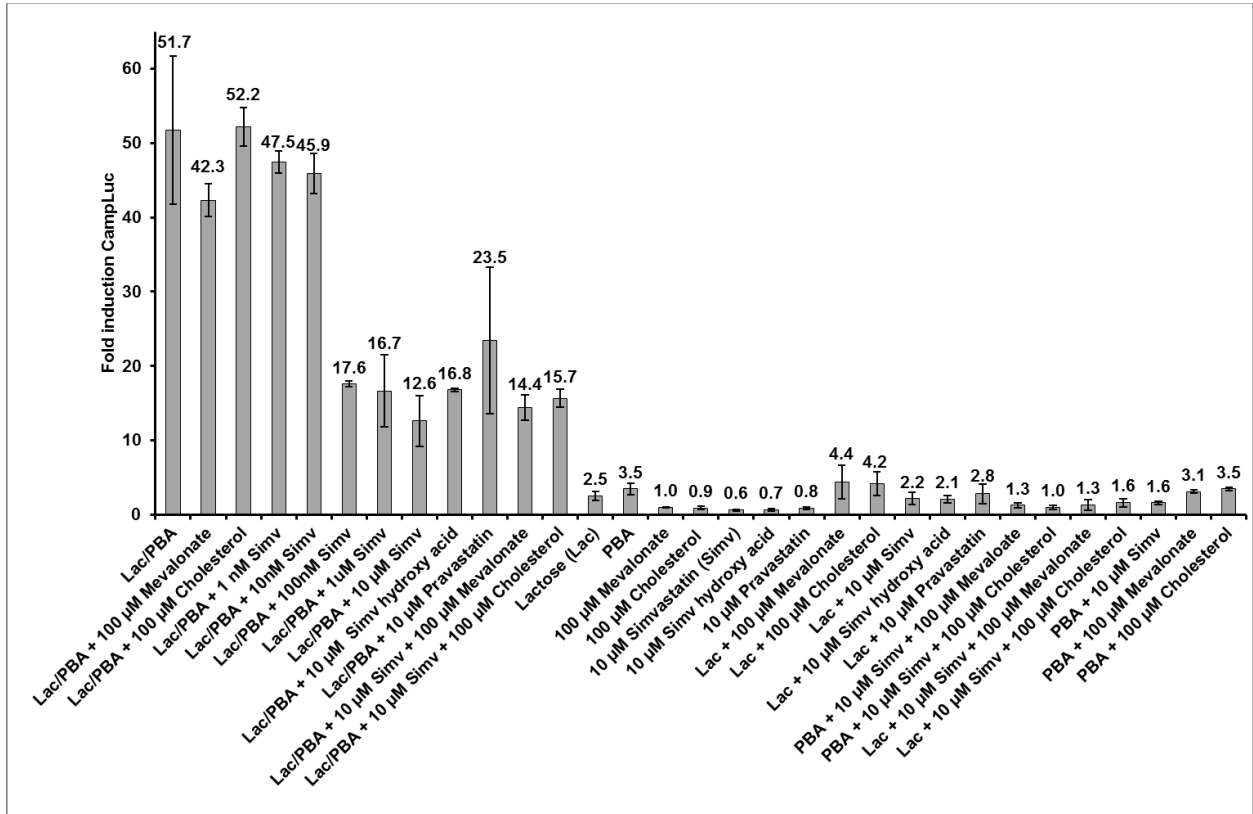

**Online Supplementary figure legends**

**Fig. S1. Screen of the MN8CampLuc cell line with compounds involved in TR/RXR signaling.**

Incubation of MN8CampLuc cells with T3, T4 or ATRA together with either lactose or PBA. The results are shown as fold induction relative to vehicle control and the data shows the mean and SD of at least four independent experiments performed in duplicate.

**Fig. S2. Screen of the MN8CampLuc cell line using compounds involved in eicosanoid**

**biosynthesis.** Incubation of MN8CampLuc cells with the 5-LO-activating protein (FLAP) inhibitor MK-886 in combination with lactose and or PBA. The results are shown as fold induction relative to vehicle control and the data shows the mean and SD of at least four independent experiments performed in duplicate.

**Fig. S3.** Incubation of MN8CampLuc cells with inhibitors to HMG-CoA reductase (Simvastatin, Pravastatin and Simvastatin hydroxyl acid) results in an inhibition of the PBA/lactose-mediated synergism on hCAP18Luc expression. No rescuing effect was observed by administration of either mevalonate or cholesterol in cells incubated with simvastatin. The results are shown as fold induction relative to vehicle control and the data shows the mean and SD of at least four independent experiments performed in duplicate.
